# Supplementary material for: Effect of Different Corticosteroid Regimens on the Outcome of Severe COVID-19-Related Acute Respiratory Failure. A Retrospective Analysis
Source: MDPI journal article supplement (doi:10.3390/jcm10214847), 2021-10-21
Supplement: s1 [file s1]

**Effect of Different Corticosteroid Regimens on the Outcome of Patients with Severe  
COVID-19-Related Acute Respiratory Failure. A Retrospective Analysis**

Paolo Formenti, Michele Umbrello, Stefano Nespoli, Eleonora Pisano, Cecilia Bonino, Stefano Muttini

**SUPPLEMENTARY DIGITAL CONTENT**

**Table S1.** Comorbidities, treatment received before ICU admission, blood biochemistry, gas exchange and respiratory physiology at ICU admission, and outcomes of the patients enrolled in the study.

|                                                                 |                   |
|-----------------------------------------------------------------|-------------------|
| Male sex – n (%)                                                | 69 (85.2)         |
| Age (years)                                                     | 60±10             |
| Height (cm)                                                     | 172±8             |
| Actual body weight (kg)                                         | 82±17             |
| Body mass index (kg/m <sup>2</sup> )                            | 27.4±5.2          |
| Predicted body weight (kg)                                      | 67±6              |
| SAPS II score                                                   | 27±7              |
| SOFA score                                                      | 4 [3; 6]          |
| Frailty score                                                   | 2 [2; 3]          |
| <b>Comorbidities – n (%)</b>                                    |                   |
| Hypertension                                                    | 30 (37.0)         |
| Diabetes                                                        | 11 (13.6)         |
| Obesity                                                         | 18 (22.2)         |
| COPD                                                            | 4 (4.9)           |
| Duration of symptoms before hospitalization (days)              | 7 [5; 10]         |
| CPAP before ICU admission – n (%)                               | 73 (90.1)         |
| Prone position during CPAP – n (%)                              | 37 (45.6)         |
| Duration of CPAP before intubation (days)                       | 3 [1; 5]          |
| Tracheostomy – n (%)                                            | 26 (32.1)         |
| Corticosteroid therapy – n (%)                                  | 80 (98.8)         |
| <b>Type of corticosteroid drug – n (%)</b>                      |                   |
| Dexamethasone                                                   | 51 (63.8)         |
| Methylprednisolone                                              | 29 (36.2)         |
| Tocilizumab – n (%)                                             | 22 (27.2)         |
| <b>Biochemistry at ICU admission</b>                            |                   |
| Procalcitonin (µg/L)                                            | 0.39 [0.18; 0.89] |
| C-reactive protein (mg/L)                                       | 14.6 [10.0; 22.3] |
| Fibrinogen (mg/100 mL)                                          | 677 [595; 760]    |
| D-dimer (ng/mL)                                                 | 2121 [764; 4796]  |
| Haemoglobin (g/dL)                                              | 11.4±1.8          |
| Platelet count (1/mm <sup>3</sup> )                             | 273013±104444     |
| White blood cell (1/mm <sup>3</sup> )                           | 9251±4006         |
| Creatinine (mg/dL)                                              | 0.85±0.35         |
| Bilirubin (mg/dL)                                               | 0.65 [0.43; 1.02] |
| Interleukin-6 (ng/L)                                            | 84 [25; 186]      |
| <b>Mechanical ventilation and gas exchange at ICU admission</b> |                   |
| Respiratory system compliance (ml/cmH <sub>2</sub> O)           | 49.9±15.2         |
| Airway driving pressure (cmH <sub>2</sub> O)                    | 10 [8; 12]        |
| Airway plateau pressure (cmH <sub>2</sub> O)                    | 24 [22; 26]       |
| PEEP (cmH <sub>2</sub> O)                                       | 14 [14; 15]       |
| Tidal volume (mL)                                               | 494±53            |
| Tidal volume (mL/kg abw)                                        | 7.4±0.8           |

|                                                        |             |
|--------------------------------------------------------|-------------|
| Respiratory rate (1/min)                               | 19±3        |
| FiO <sub>2</sub> (%)                                   | 70.4±14.9   |
| pH                                                     | 7.37±0.08   |
| PaO <sub>2</sub> (mmHg)                                | 131.8±51.0  |
| PaCO <sub>2</sub> (mmHg)                               | 49.4±11.6   |
| PaO <sub>2</sub> /FiO <sub>2</sub> (mmHg)              | 193.3±74.2  |
| <b>Outcomes</b>                                        |             |
| Duration of mechanical ventilation (days)              | 12 [7; 18]  |
| Duration of pressure support ventilation (days)        | 3 [1; 6]    |
| ICU length of stay (days)                              | 13 [7; 21]  |
| Hospital length of stay (days)                         | 23 [17; 35] |
| Ventilator-free days (days)                            | 4 [0; 20]   |
| ICU mortality – n (%)                                  | 33 (40.7)   |
| Hospital mortality – n (%)                             | 37 (45.7)   |
| Patients who developed VAP – n (%)                     | 40 (49.3)   |
| Number of VAP per patient                              | 2 [1; 2]    |
| Patients who developed bacteremia – n (%)              | 31 (38.3)   |
| Number of bacteremias per patient                      | 1 [1; 2]    |
| High-dose rescue boluses of methylprednisolone – n (%) | 22 (27.2)   |
| Day in which the rescue bolus was administered         | 6 [4; 9]    |

SAPS II: Simplified acute physiology score 2nd version; SOFA: Sequential organ failure assessment; COPD: Chronic obstructive pulmonary disease; CPAP: Continuous positive airway pressure; ICU: Intensive care unit; PEEP: Positive end-expiratory pressure; FiO<sub>2</sub>: Fraction of inspired oxygen; VAP: ventilator-associated pneumonia

**Table S2.** Segmented Regression on weekly ICU length of stay data.

| Parameter                                         | Estimate | Standard Error | 95% CI       | p      |
|---------------------------------------------------|----------|----------------|--------------|--------|
| <i>First period (dexamethasone)</i>               |          |                |              |        |
| Slope                                             | 3.54     | 4.68           | -5.78; 12.87 | 0.452  |
| Intercept                                         | 21.08    | 6.79           | 7.54; 34.61  | 0.003  |
| <i>Second period (methylprednisolone)</i>         |          |                |              |        |
| Slope                                             | 2.13     | 2.20           | -2.25; 6.52  | 0.336  |
| Intercept                                         | 14.18    | 3.19           | 7.82; 20.54  | <0.001 |
| <i>Difference between second and first period</i> |          |                |              |        |
| Slope                                             | -1.41    | 5.17           | -11.72; 8.90 | 0.786  |
| Intercept                                         | -6.90    | 7.50           | -21.85; 8.05 | 0.361  |

Outcome is the length of ICU stay. Linear regression model assessed change in slope and intercept after the change in the corticosteroid drug (methylprednisolone vs. dexamethasone). Time: week since start of study (1–3 dexamethasone and 4–6 methylprednisolone). Intervention: 0 for dexamethasone, 1 for methylprednisolone.

**Table S3.** Time course of respiratory system compliance, PaO<sub>2</sub>/FiO<sub>2</sub> ratio, SOFA score and the ventilatory ratio at ICU admission, at the time of the bolus, and after 7 and 14 days in patients classified as responders vs. non-responders to the rescue boluses of corticosteroids.

|                                                            | <b>Admission<br/>(n=22)</b> | <b>Bolus<br/>(n=22)</b> | <b>+7 days<br/>(n=19)</b> | <b>+14 days<br/>(n=19)</b> | <b>p (time)</b> | <b>p (resp)</b>   | <b>p (time*resp)</b> |
|------------------------------------------------------------|-----------------------------|-------------------------|---------------------------|----------------------------|-----------------|-------------------|----------------------|
| <b>Respiratory system compliance (ml/cmH<sub>2</sub>O)</b> |                             |                         |                           |                            | <b>0.0133</b>   | <b>0.0086</b>     | <b>0.4440</b>        |
| Responders                                                 | 52.1±19.6                   | 50.0±15.6               | 42.9±10.5                 | 44.8±16.4                  |                 |                   |                      |
| Non responders                                             | 49.2±11.7                   | 40.8±10.2               | 38.8±7.9                  | 31.0±12.2                  |                 |                   |                      |
| <b>PaO<sub>2</sub>/FiO<sub>2</sub> (mmHg)</b>              |                             |                         |                           |                            | <b>0.0251</b>   | <b>&lt;0.0001</b> | <b>0.0023</b>        |
| Responders                                                 | 179.1±57.9                  | 116.7±18.1              | 185.0±49.6                | 209.7±37.5                 |                 |                   |                      |
| Non responders                                             | 149.6±62.4                  | 113.2±39.4              | 108.2±42.3                | 74.6±19.9                  |                 |                   |                      |
| <b>Total SOFA</b>                                          |                             |                         |                           |                            | <b>0.2444</b>   | <b>0.0321</b>     | <b>0.0080</b>        |
| Responders                                                 | 4.7±2.3                     | 4.2±1.4                 | 3.5±1.9                   | 3.3±1.3                    |                 |                   |                      |
| Non responders                                             | 3.8±1.2                     | 4.3±0.9                 | 4.3±1.3                   | 6.3±2.8                    |                 |                   |                      |
| <b>Ventilatory ratio</b>                                   |                             |                         |                           |                            | <b>0.0004</b>   | <b>0.0406</b>     | <b>0.0513</b>        |
| Responders                                                 | 1.68±0.26                   | 2.48±0.72               | 2.21±0.58                 | 2.30±0.55                  |                 |                   |                      |
| Non responders                                             | 1.93±0.52                   | 2.16±0.55               | 2.60±0.48                 | 3.12±1.08                  |                 |                   |                      |

SOFA: Sequential organ failure assessment score

**Table S4.** Comparison of baseline characteristics and worst clinical data over the first 10 days of stay in patients who received the rescue boluses of corticosteroids and were classified as responders vs. non-responders.

|                                                                      | Bolus – NR<br>(n=10 – 45.5%) | Bolus – R<br>(n=12 – 54.5%) | p       |
|----------------------------------------------------------------------|------------------------------|-----------------------------|---------|
| Male sex – n (%)                                                     | 8 (88.9)                     | 10 (83.3)                   | 0.7190  |
| Age (years)                                                          | 58±7                         | 61±8                        | 0.4425  |
| Height (cm)                                                          | 171±6                        | 172±5                       | 0.8490  |
| Actual body weight (kg)                                              | 88±13                        | 81±15                       | 0.3030  |
| Body mass index (kg/m <sup>2</sup> )                                 | 30.0±4.9                     | 27.4±5.2                    | 0.2657  |
| Predicted body weight (kg)                                           | 66±5                         | 67±4                        | 0.8612  |
| SAPS II score                                                        | 25.6±9.1                     | 26.3±4.6                    | 0.8283  |
| SOFA score                                                           | 4 [3; 4]                     | 5 [3; 7]                    | 0.4479  |
| Duration of symptoms before hospitalization (days)                   | 7 [5; 9]                     | 8 [6; 10]                   | 0.6095  |
| CPAP before ICU admission – n (%)                                    | 9 (100)                      | 12 (100)                    | >0.9999 |
| Prone position during CPAP – n (%)                                   | 3 (33.3)                     | 8 (66.7)                    | 0.1301  |
| Duration of CPAP before intubation (hours)                           | 49 [16; 96]                  | 28 [8; 54]                  | 0.4136  |
| Day in which the bolus is administered (days)                        | 6 [2; 9]                     | 6 [5; 9]                    | 0.5176  |
| Tocilizumab – n (%)                                                  | 5 (55.6)                     | 3 (25)                      | 0.1543  |
| <b>Biochemistry at ICU admission</b>                                 |                              |                             |         |
| Procalcitonin (µg/L)                                                 | 0.33 [0.22; 0.36]            | 0.51 [0.21; 1.46]           | 0.2554  |
| C-reactive protein (mg/L)                                            | 17.3 [12.9; 24.9]            | 20.0 [13.4; 22.9]           | 0.9716  |
| Fibrinogen (mg/100 mL)                                               | 760 [680; 786]               | 677 [612; 786]              | 0.4318  |
| D-dimer (ng/mL)                                                      | 4128 [1670; 4631]            | 978 [581; 8194]             | 0.7573  |
| Bilirubin (mg/dL)                                                    | 0.56 [0.49; 1.07]            | 0.55 [0.38; 0.75]           | 0.6185  |
| Interleukin-6 (ng/L)                                                 | 135 [38; 359]                | 237 [148; 164]              | 0.5677  |
| <b>Worst respiratory mechanics and gas exchange before the bolus</b> |                              |                             |         |
| Respiratory system compliance (ml/cmH <sub>2</sub> O)                | 40.8±10.2                    | 50.0±15.6                   | 0.1403  |
| Airway driving pressure (cmH <sub>2</sub> O)                         | 13 [11; 15]                  | 13 [11; 17]                 | 0.8853  |
| Airway plateau pressure (cmH <sub>2</sub> O)                         | 28 [23; 28]                  | 26 [22; 30]                 | 0.8865  |
| PEEP (cmH <sub>2</sub> O)                                            | 13 [12; 15]                  | 12 [10; 13]                 | 0.0910  |
| Tidal volume (mL)                                                    | 511±43                       | 574±96                      | 0.0842  |
| Respiratory rate (1/min)                                             | 21±2                         | 20±3                        | 0.2170  |
| FiO <sub>2</sub> (%)                                                 | 78.8±11.4                    | 65.4±14.7                   | 0.0343  |
| pH                                                                   | 7.43±0.06                    | 7.38±0.07                   | 0.1203  |
| PaO <sub>2</sub> (mmHg)                                              | 87.6±26.5                    | 75.2±15.9                   | 0.1931  |
| PaCO <sub>2</sub> (mmHg)                                             | 49.6±8.0                     | 54.1±11.7                   | 0.3336  |
| PaO <sub>2</sub> /FiO <sub>2</sub> (mmHg)                            | 113.2±39.4                   | 116.7±18.1                  | 0.7909  |
| SOFA score (points)                                                  | 4.6±1.0                      | 5.4±1.6                     | 0.1673  |

SAPS II: Simplified acute physiology score 2nd version; SOFA: Sequential organ failure assessment; COPD: Chronic obstructive pulmonary disease; CPAP: Continuous positive airway pressure; ICU: Intensive care unit; PEEP: Positive end-expiratory pressure; FiO<sub>2</sub>: Fraction of inspired oxygen
